# Supplementary material
Source: PubMed Central journal article supplement (PMC4650572)
Supplement: cr20151x1.pdf [file cr20151x1.pdf]

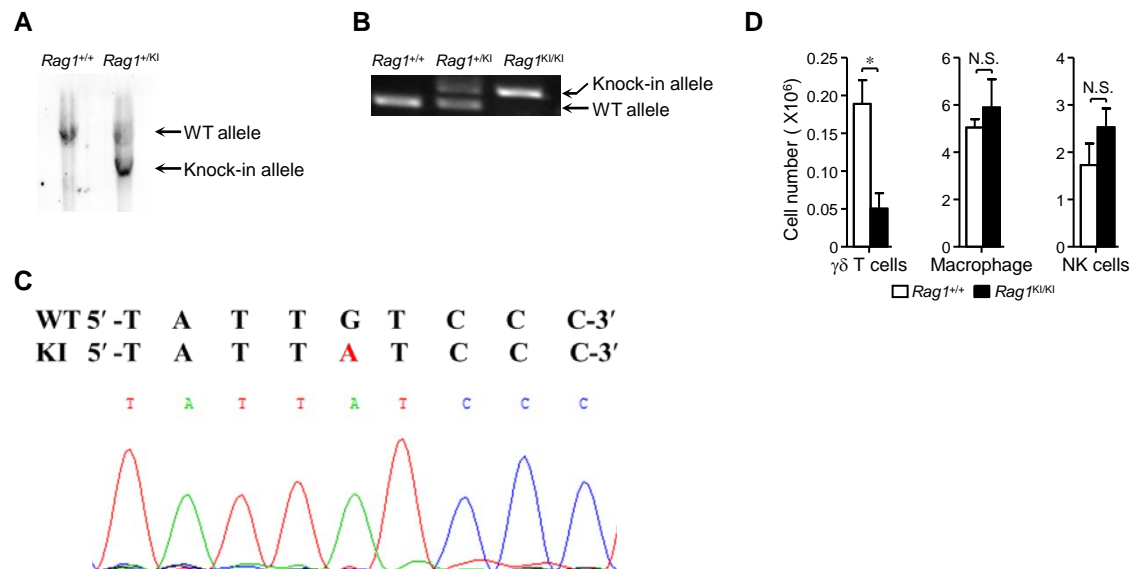

**Supplementary Figure 1. Generation of RAG1<sup>KI/KI</sup> mice.** (A) Targeted ES clones were identified by PCR. Positive clones were then analyzed by Southern blot. (B) PCR analysis of tail DNA prepared from RAG1<sup>+/+</sup>, RAG1<sup>KI/+</sup>, and RAG1<sup>KI/KI</sup> mice to verify that the floxed PgkNeo cassette had been removed. (C) Sequence analysis of the C335Y site from RAG1<sup>KI/KI</sup> mice confirmed the mutation. (D) Cell numbers of the indicated subsets in lymph nodes (mean ± SEM; n=3; \**P* < 0.05 by Student's *t*-test; N.S., no significance).
