# Supplementary material
Source: PubMed Central journal article supplement (PMC4650572)
Supplement: cr20151x3.pdf [file cr20151x3.pdf]

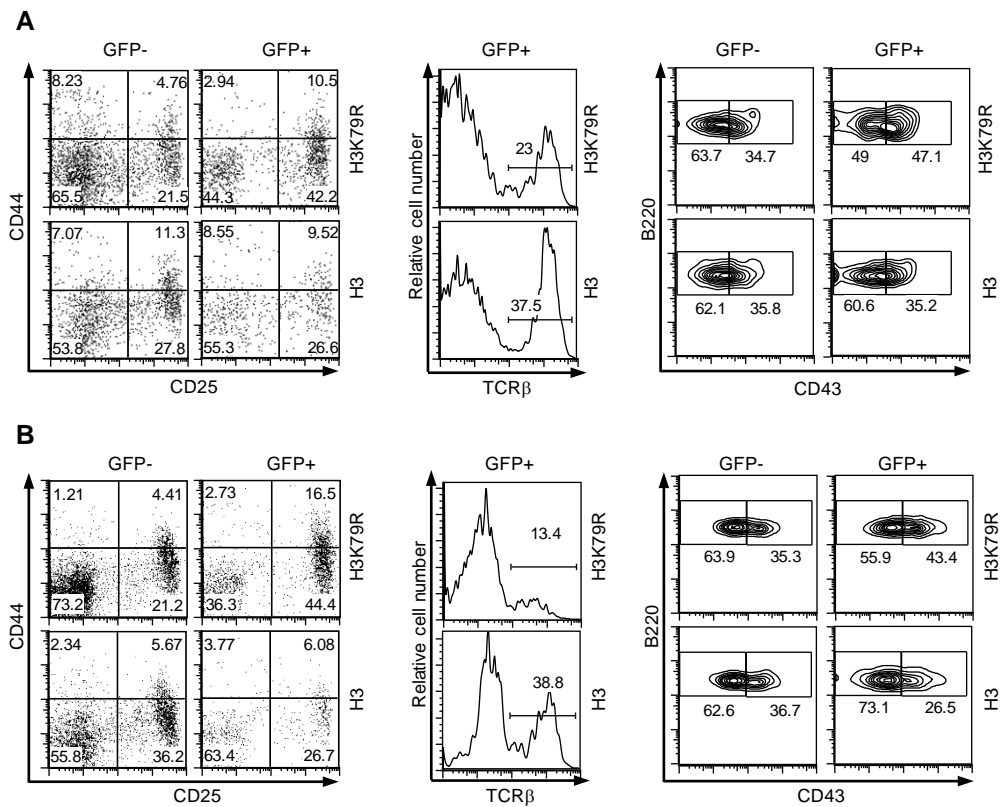

**Supplementary Figure S3. Two additional repeats of the bone marrow transfer experiment in Figure 4. (A, B)** The development of DN thymocytes (TCR $\beta$  expression in DN3 thymocytes) and early B cells transfected with indicated mutant histone H3 were assessed by flow cytometry.
