# Supplementary material
Source: PubMed Central journal article supplement (PMC4650572)
Supplement: cr20151x4.pdf [file cr20151x4.pdf]

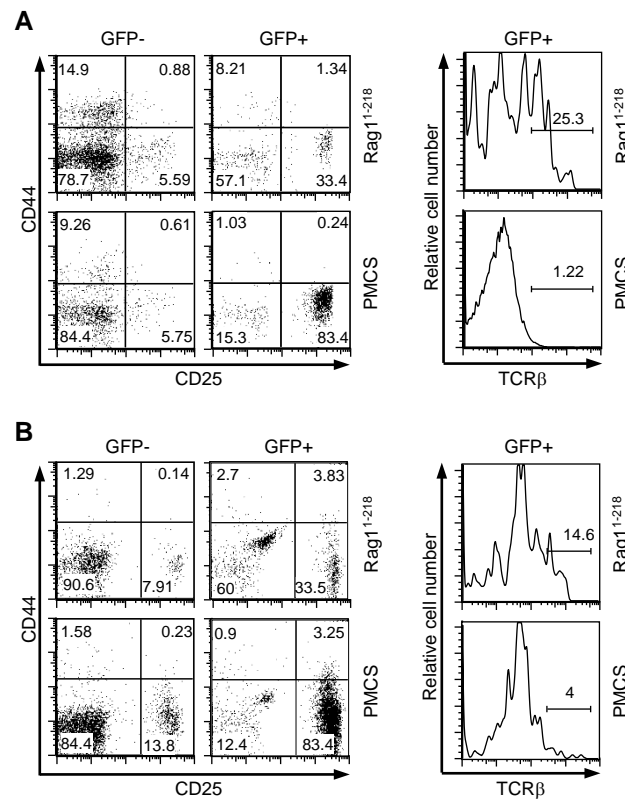

**Supplementary Figure S4. Two additional repeats of the bone marrow transfer experiment in Figure 5. (A, B) The development of DN thymocytes (TCR $\beta$  expression in DN3 thymocytes) transfected with indicated constructs was assessed by flow cytometry.**
